# Supplementary material for: The two domains of centrin have distinct basal body functions in Tetrahymena
Source: PubMed Central journal article supplement — Mol Biol Cell. 2011 Jul 1;22(13):2221–34. doi: 10.1091/mbc.E11-02-0151 (PMC3128525; doi:10.1091/mbc.e11-02-0151), 2011-07-01
Supplement: E11-02-0151_1.pdf [file E11-02-0151_1.pdf]

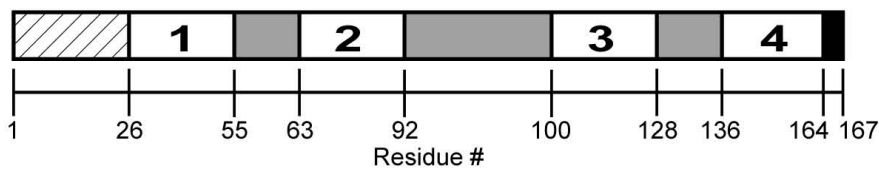

| MUTANT ALLELE                                | MUTATION                                  | PHENOTYPE                                                    |
|----------------------------------------------|-------------------------------------------|--------------------------------------------------------------|
| <b>DOMAIN DELETIONS</b>                      |                                           |                                                              |
| N-terminal domain deletion                   | Residues 1-92 deleted                     | Lethal                                                       |
| C-terminal domain deletion                   | Residues 93-167 deleted                   | Lethal                                                       |
| <b>EF HAND MUTATIONS</b>                     |                                           |                                                              |
| 1 <sup>st</sup> EF hand                      | D36A                                      | None                                                         |
| 2 <sup>nd</sup> EF hand                      | D72A                                      | None                                                         |
| 1 <sup>st</sup> and 2nd EF hand              | D36A, D72A                                | Basal body disorganization (TS)                              |
| 3 <sup>rd</sup> EF hand                      | D109A                                     | Slight defects in basal body organization and stability (TS) |
| 4 <sup>th</sup> EF hand                      | D145A                                     | Basal body disorganization and stability defects (TS)        |
| 3 <sup>rd</sup> and 4th EF hand              | D109A, D145A                              | Lethal                                                       |
| 4x EF hand                                   | D36A, D72A, D109A, D145A (all 4 EF hands) | Lethal                                                       |
| <b>OTHER DELETIONS</b>                       |                                           |                                                              |
| N-terminal tail deletion                     | Residues 2-26 deleted                     | Lethal                                                       |
| Linker deletion 1                            | Residues 92-95 deleted                    | Lethal                                                       |
| Linker deletion 2                            | Residues 96-99 deleted                    | Lethal                                                       |
| C-terminal tail deletion                     | Residues 165-167 deleted                  | Basal body disorganization and stability defects (TS)        |
| <b>CHARGED RESIDUES TO ALANINE MUTATIONS</b> |                                           |                                                              |
| 14                                           | R14A, R17A                                | Lethal                                                       |
| 22                                           | E22A, E23A, K25A                          | Mild basal body disorganization (TS)                         |
| 27                                           | E27A, K29A, E30A                          | Lethal                                                       |
| 29                                           | K29A, E30A, D33A                          | Basal body disorganization (TS)                              |
| 49                                           | K49A, R53A                                | Mild basal body disorganization (TS)                         |
| 58                                           | E58A, K60A, K61A                          | Basal body disorganization (TS)                              |
| 60                                           | K60A, K61A, E62A, E63A                    | Basal body disorganization (TS)                              |
| 86                                           | D86A                                      | None                                                         |
| 94                                           | E94A, R95A, D96A                          | Basal body disorganization and stability defects (TS)        |
| 98                                           | R98A, D99A, E100A                         | Lethal                                                       |
| 103                                          | K103A, R106A                              | Basal body disorganization and stability defects (TS)        |
| 126                                          | R126A, E127A, E130A                       | Basal body disorganization and stability defects (TS)        |
| 134                                          | E134A, E135A, E136A                       | Basal body disorganization and stability defects (TS)        |
| 142                                          | E142A, E143A                              | Lethal                                                       |
| 159                                          | K159A, K162A, K163A                       | Lethal                                                       |

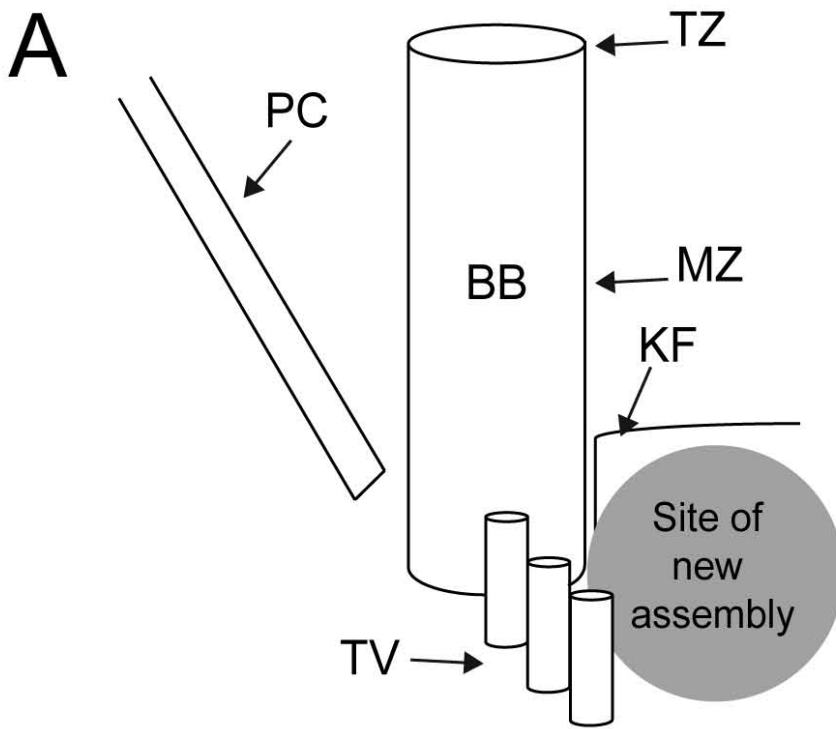

|                           | Particles per BB   | TZ             | MZ             | TV             | Site of new assembly | Proximal other | Other         |
|---------------------------|--------------------|----------------|----------------|----------------|----------------------|----------------|---------------|
| <b>WT</b>                 | 44.5<br>(N=15 BBs) | 2.1<br>(4.7%)  | 5.9<br>(13.3%) | 9<br>(20.2%)   | 25.6<br>(57.5%)      | 1.9<br>(4.3%)  | 0<br>(0%)     |
| <b>NTD double EF hand</b> | 34.1<br>(N=22 BBs) | 2.8<br>(8.2%)  | 4.5<br>(13.2%) | 6.7<br>(19.6%) | 19.3<br>(56.6%)      | 0.8<br>(2.3%)  | 0<br>(0%)     |
| <b>4th EF hand</b>        | 17.5 (N=11 BBs)    | 2.4<br>(13.7%) | 5<br>(28.6%)   | 0.5<br>(2.9%)  | 1.6<br>(9.1%)        | 6.5<br>(37.1%) | 1.5<br>(8.6%) |

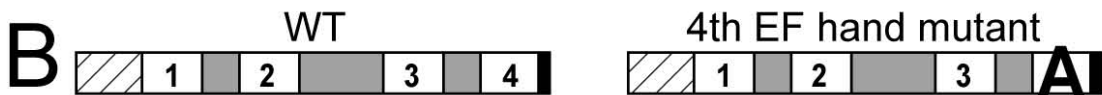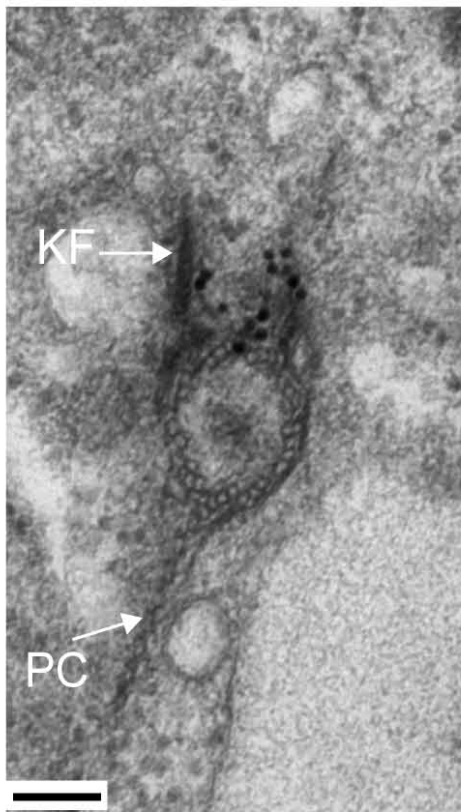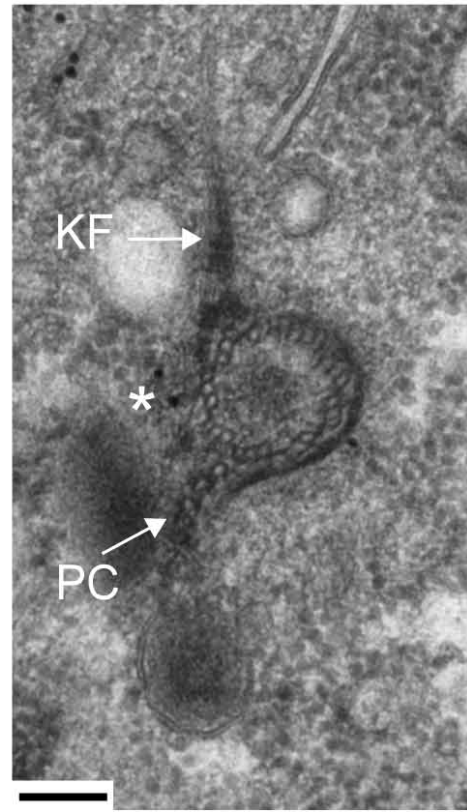

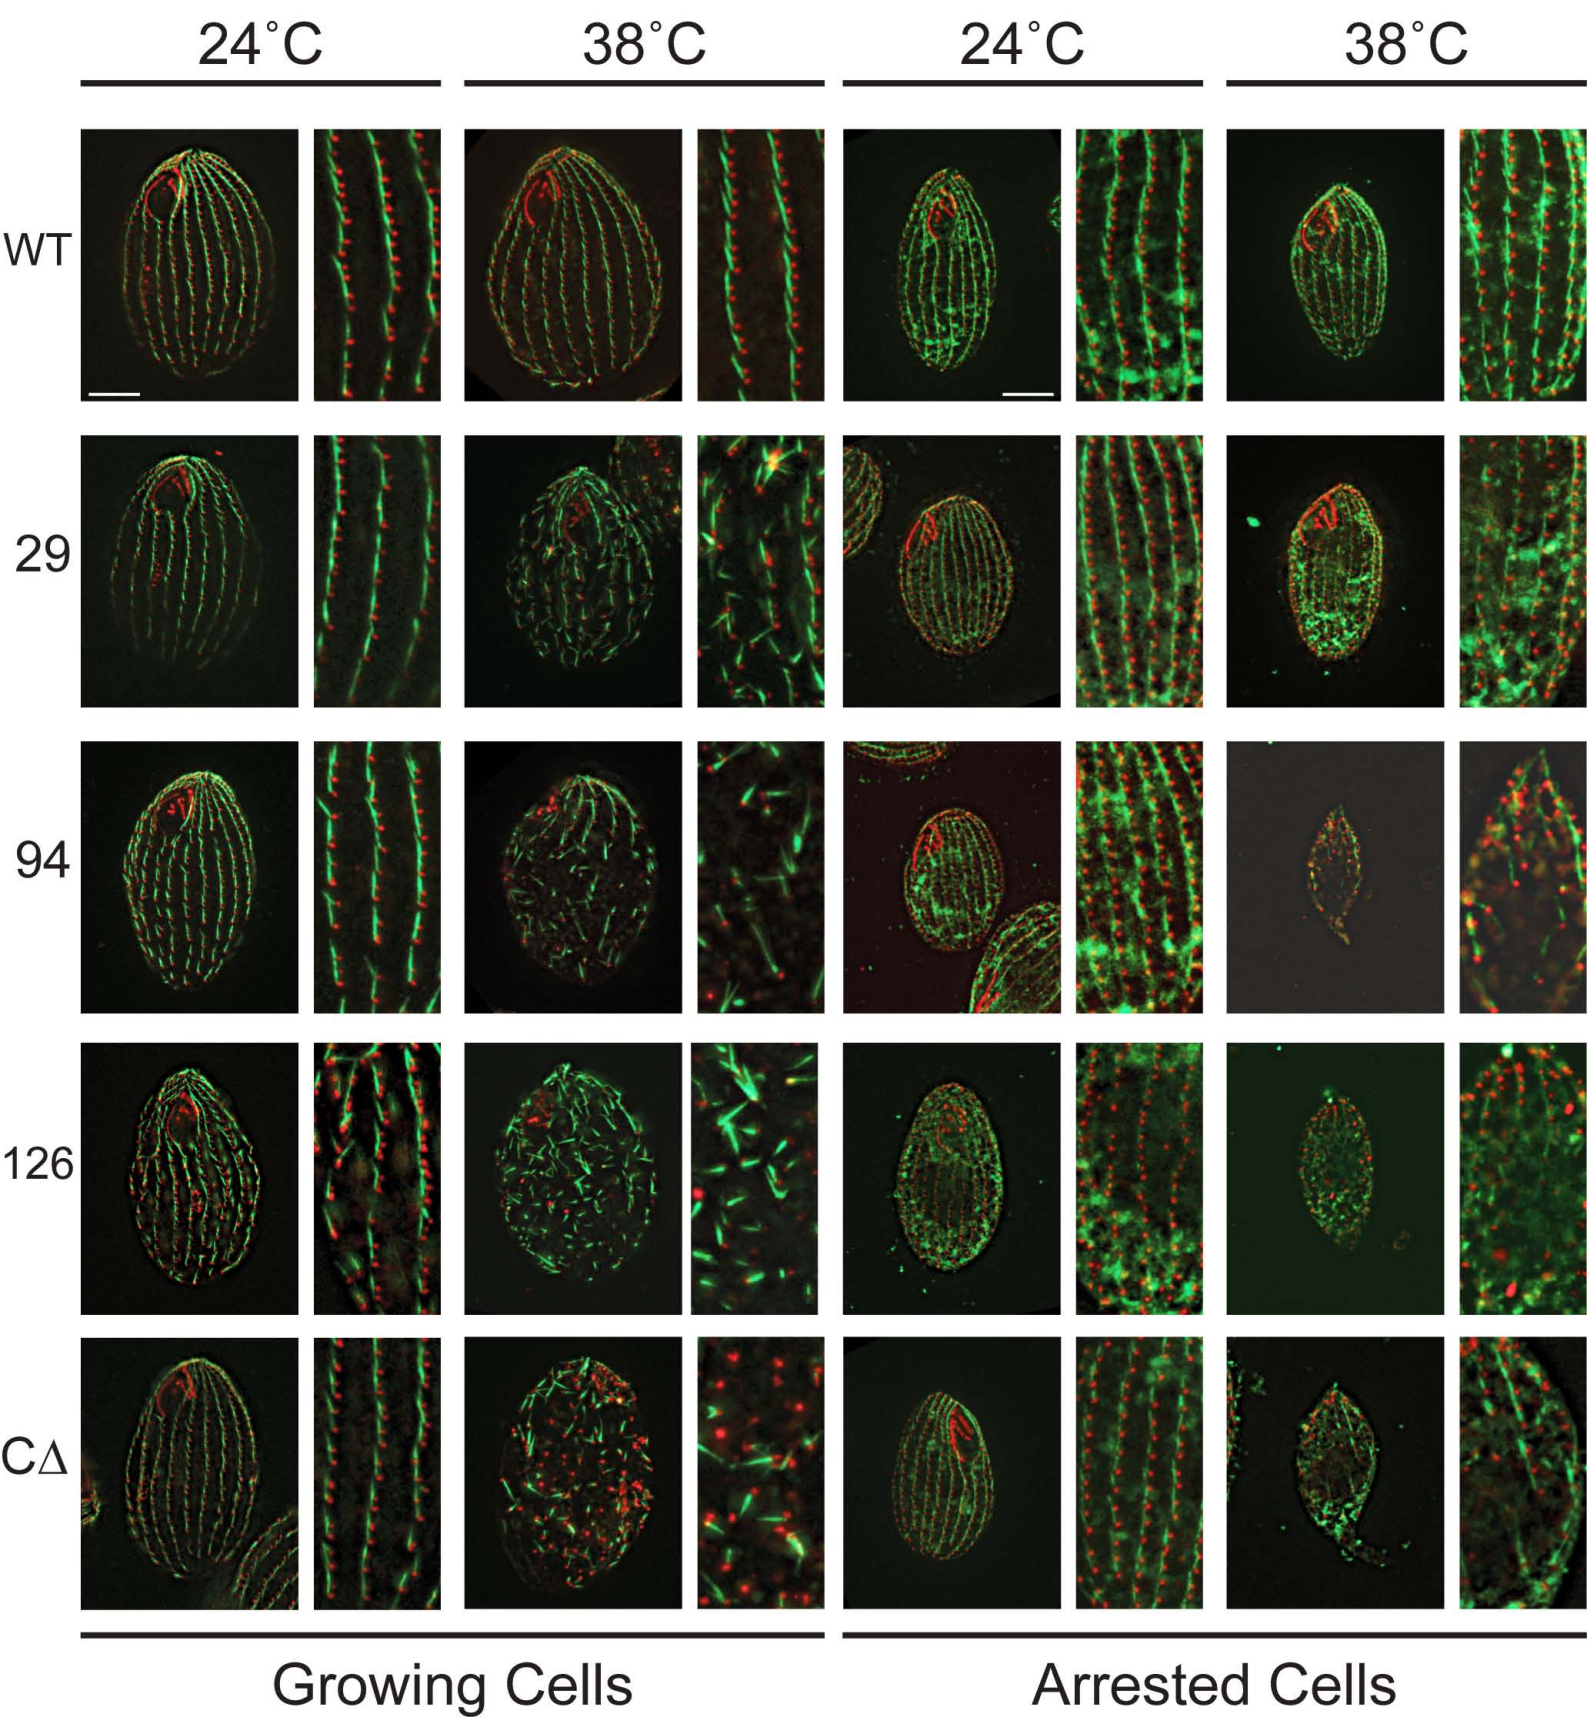

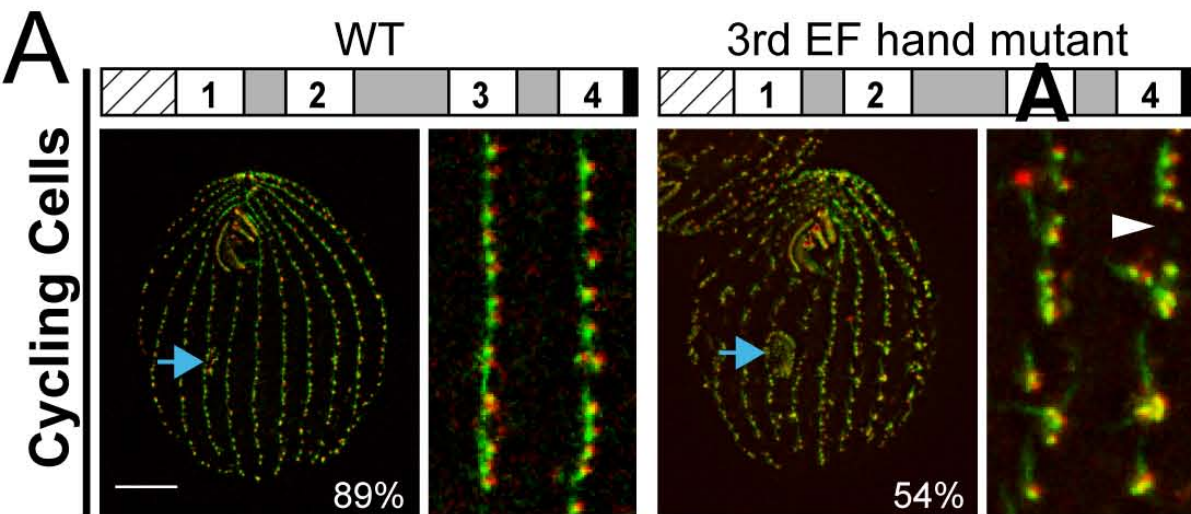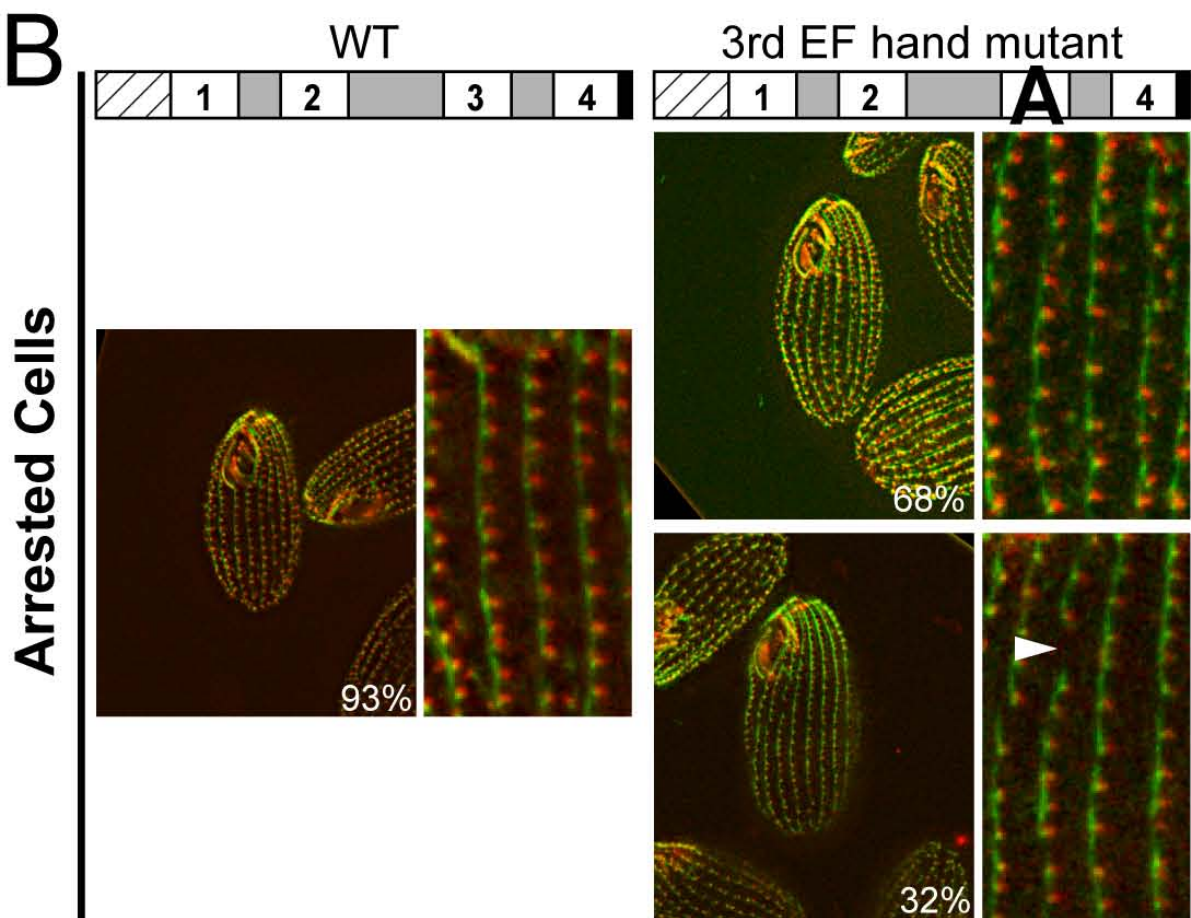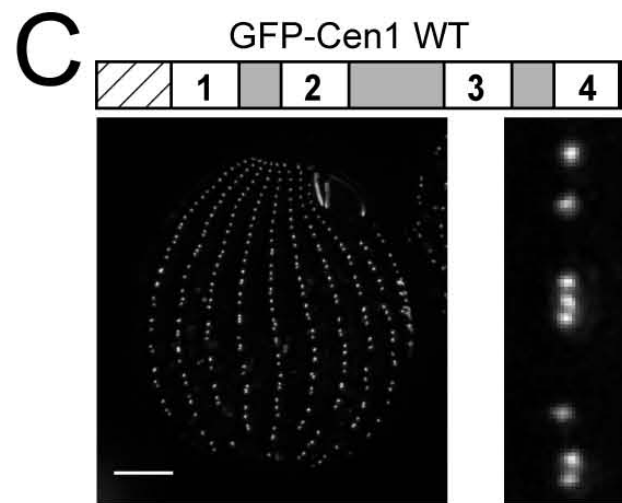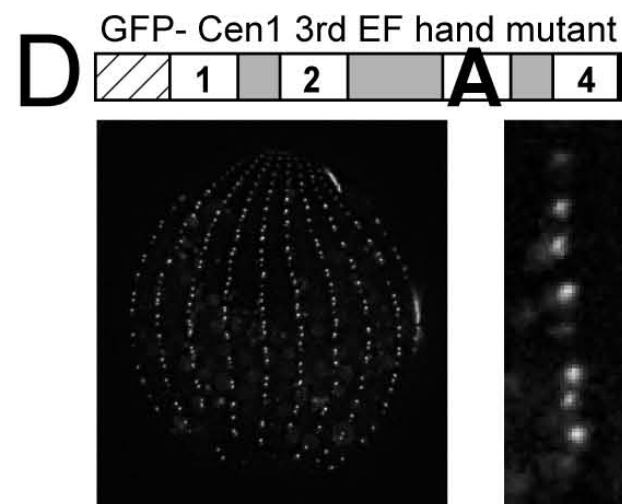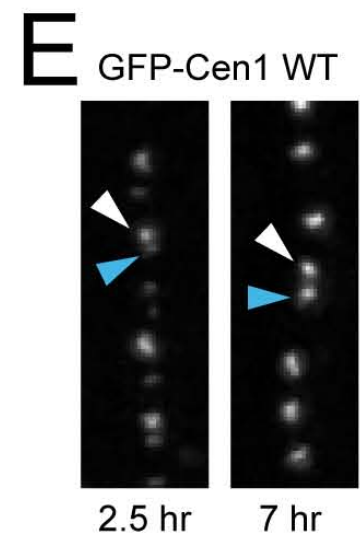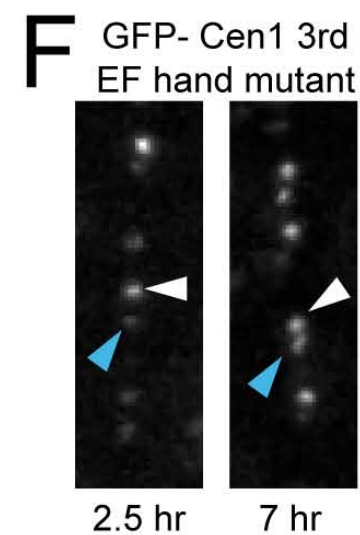

**A**

Release 2.5h

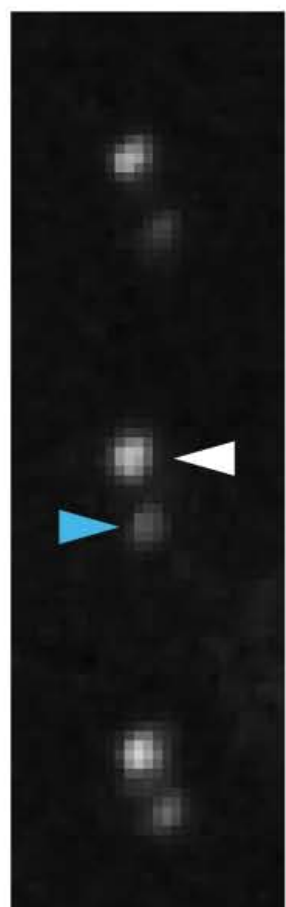GFP-Cen1  
WT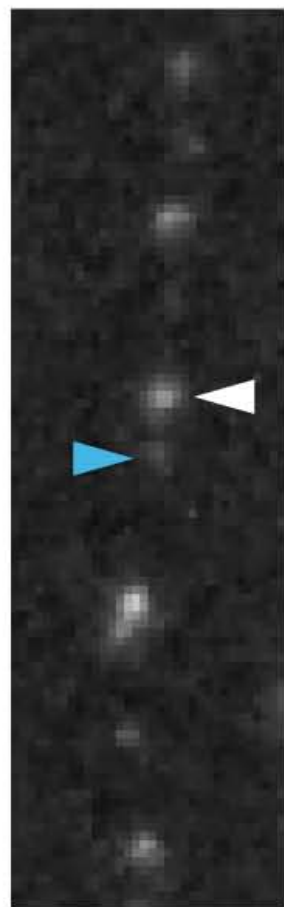GFP-Cen1  
4th EF hand  
mutant protein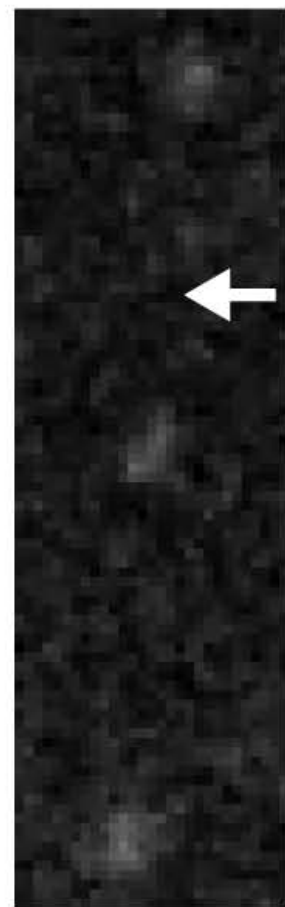GFP-Cen1  
CTD double  
EF hand  
mutant  
protein**B**

Release 7h

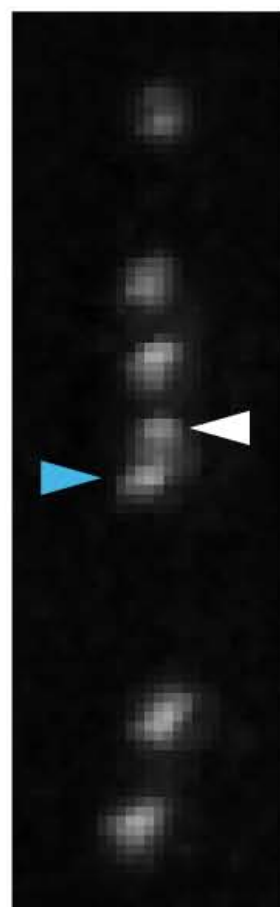GFP-Cen1  
WT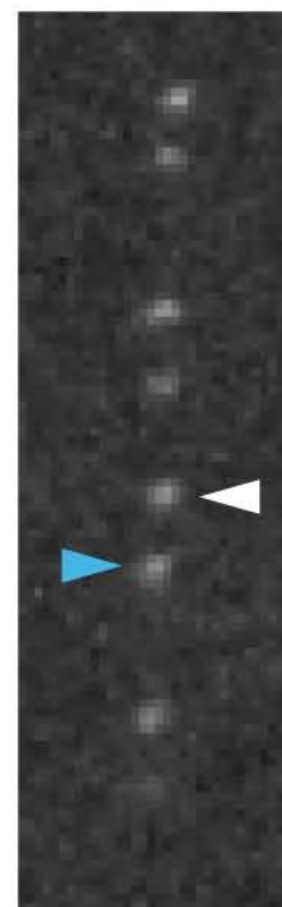GFP-Cen1  
4th EF hand  
mutant protein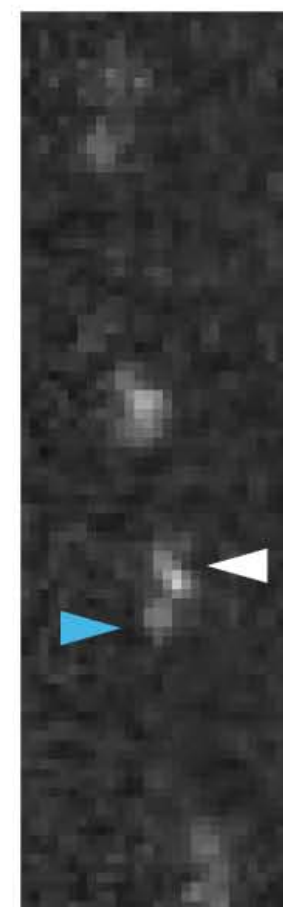GFP-Cen1  
CTD double  
EF hand  
mutant  
protein
